# Supplementary material
Source: publisher figshare collection journal article supplement (https://karger.figshare.com/ndownloader/files/22067607)
Supplement: Supplementary file 1 [file 22067607]

# Online Supplement File 4:

# List of reported neurological, psychological and genetic diseases

## List of reported neurological diseases

| **Neurologic diseases** |  |  |
| --- | --- | --- |
| **ICD10 Name** | **ICD10 code** | **Count** |
| Agenesis of corpus callosum | Q040 | 1 |
| Arteriovenous malformation of brain NOS | Q282 | 1 |
| Benign childhood epilepsy with centrotemporal EEG spikes | G400 | 2 |
| Benign intracranial hypertension | G932 | 2 |
| brain tumor | C719 | 8 |
| Cerebrovascular disease, unspecified | I679 | 1 |
| Degenerative disease of nervous system, unspecified | G319 | 1 |
| Degenerative disease of nervous system, unspecified | G43 | 1 |
| Depression NOS | F329 | 1 |
| Dizziness and giddiness | R42 | 1 |
| Dyslexia and alexia | R480 | 2 |
| Dystonia, unspecified | G249 | 1 |
| Encephalitis, myelitis and encephalomyelitis | G04 | 1 |
| Epilepsy, unspecified | G409 | 106 |
| Febrile convulsions | R560 | 10 |
| Generalized idiopathic epilepsy and epileptic syndromes | G403 | 1 |
| Grand mal seizures, unspecified (with or without petit mal) | G406 | 1 |
| Headache | R51 | 1 |
| Hearing loss, unspecified | H919 | 1 |
| Hydrocephalus | G91 | 9 |
| Intracerebral haemorrhage, intraventricular | I615 | 1 |
| Localization-related (focal)(partial) symptomatic epilepsy | G401 | 2 |
| Medulloblastoma | C716 | 1 |
| Meningitis, unspecified | G039 | 1 |
| Migraine | G43 | 187 |
| Moyamoya disease | I675 | 1 |
| Obsessive-compulsive disorder, unspecified | F429 | 1 |
| Ophthalmoplegic migraine | G438 | 3 |
| Other and unspecified symptoms and signs involving cognitive functions and awareness | R418 | 1 |
| Other and unspecified symptoms and signs involving the nervous and musculoskeletal systems | R298 | 1 |
| Other epilepsy | G408 | 1 |
| Other specified headache syndromes | G448 | 2 |
| Personal history of medical treatment, unspecified | Z929 | 1 |
| Pervasive developmental disorder, unspecified | F849 | 1 |
| Petit Mal seizure | G407 | 1 |
| Petit mal, unspecified | G407 | 1 |
| Plagiocephaly | Q673 | 2 |
| Sinusitis (chronic) NOS | J329 | 1 |
| Tension headache NOS | G442 | 20 |
| Tremor, unspecified | R251 | 1 |
| Unspecified headache | R51 | 4 |
| unspecified neurological condition | G | 1 |
|  |  |  |
| *Missing* | NA | 2 |

## List of reported psychological/behavioral diseases

| **ICD10 Name** | **ICD10 code** | **Count** |
| --- | --- | --- |
| Agoraphobia | F40.0 | 1 |
| Anorexia nervosa | F50.0 | 7 |
| Anxiety disorder, unspecified | F41.9 | 37 |
| Aspergers Syndrome | F84.5 | 2 |
| Bipolar affective disorder, unspecified | F31.9 | 2 |
| Bulimia nervosa | F50.3 | 3 |
| Childhood autism | F84.0 | 1 |
| Childhood disorder of social functioning, unspecified | F94.9 | 1 |
| Childhood emotional disorder, unspecified | F93.9 | 1 |
| Depressive episode, unspecified | F32.9 | 37 |
| Disorder of autonomic nervous system, unspecified | G90.9 | 1 |
| Eating disorder, unspecified | F50.9 | 1 |
| Mental disorder, not otherwise specified | F99.9 | 3 |
| Mild depressive episode | F32.0 | 2 |
| Mixed anxiety and depressive disorder | F41.2 | 9 |
| Nightmares | F51.5 | 1 |
| Obsessive-compulsive disorder, unspecified | F42.9 | 1 |
| Panic disorder [episodic paroxysmal anxiety] | F41.0 | 1 |
| Personal history of self-harm | Z91.5 | 1 |
| Personality disorder, unspecified | F60.9 | 3 |
| Phobic anxiety disorder, unspecified | F40.9 | 1 |
| Post-traumatic stress disorder | F43.1 | 2 |
| Specific disorder of arithmetical skills | F81.2 | 1 |
| Trichotillomania | F63.3 | 1 |
| Unspecified disorder of psychological development | F89 | 1 |
| Unspecified nonorganic psychosis | F29 | 1 |
|  |  |  |
| *Missings* | *NA* | *2* |

## List of reported genetic disease

| **Genetic conditions** |  |  |
| --- | --- | --- |
| **ICD10 Name** | **ICD10 code** | **Count** |
| Activated protein C resistance [factor V Leiden mutation] | D685 | 1 |
| amelogenesis imperfecta | K005 | 1 |
| Atresia and stenosis of ureter | Q621 | 1 |
| Bradycardia, unspecified | R001 | 1 |
| Cardiac murmur, unspecified | R011 | 3 |
| Cardio-facio-cutaneous syndrome | Q87.8 | 1 |
| Chromosomal abnormality, unspecified | Q99.9 | 2 |
| Chromosomal abnormality, unspecified | Q999 | 1 |
| Cleft lip | Q36 | 1 |
| Coeliac disease | K900 | 1 |
| Congenital deformity of feet, unspecified | Q669 | 2 |
| congenital hypothyroidism NOS | E032 | 1 |
| Congenital malformation of cardiac chambers and connections, unspecified | Q209 | 1 |
| Congenital malformation of heart, unspecified | Q249 | 1 |
| Congenital subluxation of hip, unspecified | Q655 | 3 |
| Congenital vesico-uretero-renal reflux | Q627 | 1 |
| Crohn disease, unspecified | K509 | 1 |
| Degenerative disease of nervous system, unspecified | G319 | 1 |
| Disorder of bone, unspecified | M899 | 1 |
| Down syndrome, unspecified | Q909 | 2 |
| Fetus and newborn affected by other abnormalities of membranes | P028 | 1 |
| G6PD deficiency anaemia | D550 | 3 |
| Gilbert syndrome | E804 | 1 |
| Hyperlipidaemia, unspecified | E785 | 1 |
| Hypospadias | Q54 | 2 |
| Iron deficiency anaemia, unspecified | D509 | 1 |
| Lupus erythematosus | L93 | 1 |
| Muscular dystrophy | G710 | 1 |
| Non-follicular (diffuse) lymphoma, unspecified | C839 | 1 |
| Noonan syndrome | Q871 | 1 |
| Other congenital malformations of musculoskeletal system | Q798 | 1 |
| Polyposis (hereditary) of colon | D126 | 1 |
| Preauricular sinus and cyst | Q181 | 1 |
| Pulmonary valve atresia | Q220 | 1 |
| Renal agenesis, unilateral | Q600 | 1 |
| Scoliosis, unspecified | M419 | 1 |
| Small kidney, unilateral | N270 | 1 |
| Spastic cerebral palsy NOS | G801 | 1 |
| Strabismus, unspecified | H509 | 1 |
| Von Willebrand disease | D680 | 1 |
|  |  |  |
| Missings | NA | 2 |
